# Supplementary material
Source: publisher figshare collection journal article supplement (https://gsajournals.figshare.com/ndownloader/files/26610296)
Supplement: Supplementary file 1 [file 26610296]

## Sheet: Sheet1
Dataset S8 (separate file). Differentially Methylated and Differentially Expressed Genes and Isoforms (.xlsx workbook). Genes/isoforms that are both significantly differentially methylated and expressed are listed in each row. Each Lifestage comparison is then represented by five columns. These columns include the LOC#, the Genomic Location, and the gene name for each gene/isoform, as well as its…

## Sheet: Seq DE & DM genes
	2nd vs. 1st						3rd vs. 2nd						4th vs. 3rd						YA vs. 4th								Summary
	LOC #	Genomic Location	Gene Name	Diff. Exp. (log2FoldChange)	Diff. Meth. (% diff. meth.)		LOC #	Genomic Location	Gene Name	Diff. Exp. (log2FoldChange)	Diff. Meth. (% diff. meth.)		LOC #	Genomic Location	Gene Name	Diff. Exp. (log2FoldChange)	Diff. Meth. (% diff. meth.)		LOC #	Genomic Location	Gene Name	Diff. Exp. (log2FoldChange)	Diff. Meth. (% diff. meth.)
	LOC100159916	NC_042495.1;12983144;-	muscarinic acetylcholine receptor M3-like	-3.83712	-26.4151		LOC100162692	NC_042494.1;3614986;-	fatty acid synthase-like	-1.54063	-28.3587		LOC100163622	NC_042493.1;15367989;-	inositol 1,4,5-trisphosphate receptor-like	-1.81227	36.8547		LOC100160310	NC_042494.1;40422244;+	titin-like	1.70193	53.4965					1v2	2v3	3v4	4vY	Sum	%
	LOC100160153	NC_042493.1;125512301;+	glycerol-3-phosphate dehydrogenase, mitochondrial-like	-1.15165	54.9311		LOC100164519	NC_042494.1;26991791;-	reversion-inducing cysteine-rich protein with Kazal motifs-like	2.18594	34.7826		LOC100164739	NC_042493.1;29607698;+	acetyl-CoA carboxylase-like	-1.46219	-45.4035		LOC100164103	NC_042495.1;45119027;-	microtubule-actin cross-linking factor 1, isoforms 1/2/3/5-like	1.76179	-31.7962				red	5	7	74	0	86	76.7857
	LOC100161010	NC_042494.1;105480400;-	bipolar kinesin KRP-130-like	1.39496	42.2436		LOC100161316	NC_042494.1;48052059;+	hemicentin-2-like	1.76922	42.5062		LOC100165680	NC_042493.1;31040110;-	5-aminolevulinate synthase, erythroid-specific, mitochondrial-like	-1.7337	42.1945		LOC100568787	NC_042496.1;30402396;+	nose resistant to fluoxetine protein 6	6.02347	-41.0151				blue	4	6	13	3	26	23.2143
	LOC100161671	NC_042493.1;21028255;-	uncharacterized LOC100161671	2.41866	-27.907		LOC100168076	NC_042494.1;78290713;+	protein bicaudal C homolog 1-like	-2.09873	45.9596		LOC100169459	NC_042493.1;36905421;+	uncharacterized LOC100169459	-1.69981	-50.4112										orange	4	3	44	2	53	47.3214
	LOC100164109	NC_042495.1;61805194;-	neurogenic locus Notch protein-like	1.73558	-25.7143		LOC100165656	NC_042494.1;96722596;+	tolloid-like protein 2-like	-1.86429	30.5651		LOC100572931	NC_042493.1;47302802;-	coiled-coil domain-containing protein 22 homolog	1.44069	26.3653										green	5	10	43	1	59	52.6786
	LOC100168701	NC_042495.1;114583161;+	CUE domain-containing protein 1-like	-3.94062	32.2115		LOC100169243	NC_042494.1;118603687;+	uncharacterized LOC100169243	-2.96414	38.5185		LOC100164881	NC_042493.1;56420037;+	ral GTPase-activating protein subunit alpha-1-like	-1.97759	-45.9957										Red & Orange	2	2	37	0	41	36.6071
	LOC100572661	NC_042494.1;122100408;+	uncharacterized LOC100572661	2.04087	48.6667		LOC100574240	NC_042494.1;156854215;+	uncharacterized LOC100574240	3.55277	-26.0202		LOC100166892	NC_042493.1;56484943;-	cytosolic purine 5'-nucleotidase-like	-1.23012	-39.3154										Blue & Orange	2	1	7	2	12	10.7143
	LOC100575399	NC_042493.1;71713332;+	uncharacterized LOC100575399	-3.98087	-50.9413		LOC100168610	NC_042495.1;3929866;+	P protein-like	-2.02754	44.0909		LOC100167570	NC_042493.1;58864592;-	ATP-binding cassette sub-family F member 1-like	-1.73626	42.4951										Red & Green	3	5	37	0	45	40.1786
	LOC115033708	NC_042494.1;39961875;+	LOC115033708	-2.05823	27.2028		LOC100159664	NC_042495.1;48617015;+	mitochondrial 2-oxoglutarate/malate carrier protein-like	-1.4563	31.6292		LOC100159476	NC_042493.1;66450218;-	uncharacterized LOC100159476	-1.38197	42.0958										Blue and Green	2	5	6	1	14	12.5
							LOC100168393	NC_042495.1;77950077;+	cohesin subunit SA-1-like	1.13398	45.6829		LOC100160089	NC_042493.1;66493358;+	uncharacterized LOC100160089	-1.79114	36.8049
							LOC100159244	NC_042495.1;88379482;+	slit homolog 3 protein-like	-1.68286	-25.75		LOC100168575	NC_042493.1;66569904;-	uncharacterized LOC100168575	-1.69829	-27.7108
							LOC100165876	NC_042495.1;107636028;-	mitogen-activated protein kinase kinase kinase 15-like	2.46638	50.8641		LOC100573870	NC_042493.1;68506340;+	dihydroxyacetone phosphate acyltransferase-like	3.01658	-36.3544
			Key				LOC100165142	NC_042495.1;109300908;+	inositol-3-phosphate synthase 1-like	1.76185	37.7381		LOC100570443	NC_042493.1;121194211;+	zinc finger protein 598-like	-3.63722	-40.4365
			downregulated										LOC100168014	NC_042493.1;125239861;-	hsp70-binding protein 1-like	-1.36757	-25.5319
			up-regualted										LOC100165975	NC_042494.1;15590567;+	protein TANC2-like	-1.87724	38.8304
			hypomethylated										LOC100167271	NC_042494.1;17732594;+	possible pseudogene or miscRNA, No KEGG entry	-1.39648	33.9139
			hypermethyalted										LOC100161626	NC_042494.1;18262680;+	uncharacterized LOC100161626	-2.41648	-41.8215
													LOC100164519	NC_042494.1;26991791;-	reversion-inducing cysteine-rich protein with Kazal motifs-like	-2.57301	-32.7826
													LOC100168855	NC_042494.1;27117837;-	low-density lipoprotein receptor-related protein 2-like	-2.05376	-30.0546
													LOC100168732	NC_042494.1;47729224;-	transcription factor HNF-4 homolog	-1.57559	41.4989
													LOC100165723	NC_042494.1;49104207;-	protein fem-1 homolog CG6966-like	-1.62149	-42.3669
													LOC100162512	NC_042494.1;62905171;-	heterogeneous nuclear ribonucleoprotein 87F-like	-1.0856	25.4902
													LOC100161303	NC_042494.1;64195070;+	possible pseudogene or miscRNA, No KEGG entry	-1.68895	40.5703
													LOC100167255	NC_042494.1;66978790;+	fatty acid synthase-like	-1.1503	30.6939
													LOC100575247	NC_042494.1;72540185;-	uncharacterized LOC100575247	2.95456	43.3333
													LOC100166569	NC_042494.1;72592867;+	neurexin-4-like	2.59817	-36.5634
													LOC100167539	NC_042494.1;75762968;+	uncharacterized LOC100167539	-2.2498	-30
													LOC100164473	NC_042494.1;77951564;+	fat-like cadherin-related tumor suppressor homolog	-1.06275	36.145
													LOC100167340	NC_042494.1;78232416;-	uncharacterized LOC100167340	-1.11626	38.7755
													LOC100168765	NC_042494.1;82958739;-	60S ribosomal protein L3-like	-1.20289	40.4161
													LOC100169483	NC_042494.1;89345719;+	afadin-like	-1.29086	-42.5532
													LOC100166022	NC_042494.1;93280860;+	serine/arginine-rich splicing factor 1-like	-1.63172	31.0345
													LOC100166362	NC_042494.1;96657901;+	ATP-binding cassette sub-family F member 1-like	-2.77288	-48.9411
													LOC100161993	NC_042494.1;99536662;+	splicing factor 3B subunit 1-like	-1.11176	36.3993
													LOC100161831	NC_042494.1;101094031;-	cytosolic carboxypeptidase-like protein 5-like	1.32195	35.0725
													LOC100168198	NC_042494.1;103119545;+	elongation factor 2-like	-1.92601	44.8016
													LOC100159627	NC_042494.1;105268545;-	uncharacterized LOC100159627	-1.29552	-30.6122
													LOC100160365	NC_042494.1;118607842;-	probable serine/threonine-protein kinase nek3	-2.2314	46.2583
													LOC100169243	NC_042494.1;118607842;-	uncharacterized LOC100169243	-2.61104	46.2583
													Tmem35	NC_042494.1;122276806;-	Tmem35	1.39107	-32.4474
													LOC100162105	NC_042494.1;122975179;-	pyruvate carboxylase, mitochondrial-like	-1.05527	-37.5774
													LOC100162562	NC_042494.1;126208561;-	nuclear hormone receptor FTZ-F1-like	-2.08012	-25.8065
													LOC100167436	NC_042494.1;130347408;-	eukaryotic translation initiation factor 4H-like	-1.34836	27.795
													LOC100169491	NC_042494.1;149853444;-	triple functional domain protein-like	-1.5278	-33.2051
													LOC100160462	NC_042494.1;161559232;-	uncharacterized LOC100160462	2.32654	38.3071
													LOC100169268	NC_042494.1;165823962;+	protein furry-like	-2.14505	-41.5556
													LOC100168156	NC_042495.1;639280;+	uncharacterized LOC100168156	-1.32755	-41.381
													LOC100169393	NC_042495.1;4134651;-	neurogenic protein big brain-like	-1.72855	-35.0933
													LOC100168472	NC_042495.1;5084823;-	uncharacterized LOC100168472	-1.15684	-35.7808
													LOC100159654	NC_042495.1;6726227;-	tubulin beta-3 chain-like	-1.47086	35.8333
													LOC100169390	NC_042495.1;37023691;-	heterogeneous nuclear ribonucleoprotein K-like	-1.50263	29.2683
													LOC103310693	NC_042495.1;38515733;+	LOC103310693	-1.2628	37.4447
													LOC100161761	NC_042495.1;47661408;-	uncharacterized LOC100161761	-1.88871	-25.4545
													LOC100163696	NC_042495.1;51620693;+	uncharacterized LOC100163696	-1.08468	30.7337
													LOC100161587	NC_042495.1;52056785;+	mitochondrial-processing peptidase subunit beta-like	-1.34203	-35.4421
													LOC103308569	NC_042495.1;64163696;+	LOC103308569	3.44077	-40.2732
													LOC100161061	NC_042495.1;68619248;+	uncharacterized LOC100161061	1.14235	41.5381
													LOC100169075	NC_042495.1;76146122;-	limkain-b1-like	-1.93451	25.0375
													LOC100160760	NC_042495.1;76738719;+	derlin-2-like	-1.26278	-27.2727
													LOC100167609	NC_042495.1;76742831;+	uncharacterized LOC100167609	-1.44846	-50.1451
													LOC100167046	NC_042495.1;79344239;+	probable phosphoglycerate kinase-like	-1.03181	-33.6908
													LOC100573715	NC_042495.1;80258626;+	uncharacterized LOC100573715	3.76621	26.5306
													LOC100160060	NC_042495.1;81581711;-	protein gustavus	-2.00196	39.2208
													LOC100165462	NC_042495.1;81581711;-	3-hydroxy-3-methylglutaryl-coenzyme A reductase	-1.10512	39.2208
													LOC100570959	NC_042495.1;83106833;+	uncharacterized LOC100570959	-2.16735	29.5193
													LOC100164446	NC_042495.1;87412237;-	uncharacterized LOC100164446	-1.66516	37.0098
													LOC100163213	NC_042495.1;92477911;+	protein unc-79 homolog	3.16301	-39.899
													LOC100568638	NC_042495.1;94188388;+	poly [ADP-ribose] polymerase 12-like	-2.18829	-29.0818
													LOC100168636	NC_042495.1;97443560;+	basement membrane-specific heparan sulfate proteoglycan core protein-like	-2.24487	40.3333
													LOC100166947	NC_042495.1;100087275;+	cAMP-specific 3',5'-cyclic phosphodiesterase-like	-3.01479	26.9841
													LOC100161573	NC_042495.1;102821550;+	uncharacterized LOC100161573	-1.047	29.7225
													LOC100575820	NC_042495.1;109326208;-	centrosomal protein of 290 kDa-like	3.55764	-32.9648
													LOC100161003	NC_042495.1;110651108;+	uncharacterized LOC100161003	-1.27005	-36.4828
													LOC100162523	NC_042495.1;114617635;+	ADP-ribosylation factor-binding protein GGA1-like	1.36519	-28.007
													LOC100164603	NC_042495.1;114941886;+	RNA polymerase II elongation factor ELL-like	-1.11539	-25.732
													LOC100164040	NC_042495.1;116097912;+	LOC100164040	-1.76527	-38.8527
													LOC100165557	NC_042496.1;808690;+	uncharacterized LOC100165557	-1.37618	39.5254
													LOC100570013	NC_042496.1;2296793;-	uncharacterized LOC100570013	-1.47446	-32.786
													LOC100165750	NC_042496.1;5253899;-	ATP-dependent RNA helicase p62-like	-1.37918	-25.7802
													LOC100571903	NC_042496.1;7902803;-	putative ribosomal RNA methyltransferase C4F10.03c-like	-1.79692	-45.0935
													LOC100160456	NC_042496.1;14136229;+	uncharacterized LOC100160456	-1.26947	36.9748
													LOC100161805	NC_042496.1;14181321;-	ubiquitin-conjugating enzyme E2-24 kDa-like	-1.54061	42.4918
													LOC100167151	NC_042496.1;14983769;-	uncharacterized LOC100167151	-1.22765	34.8905
													LOC100160345	NC_042496.1;23201386;+	ubiquinone biosynthesis protein COQ9, mitochondrial-like	-1.37279	-48.0431
													LOC100158663	NC_042496.1;30286482;-	tetratricopeptide repeat protein 28-like	-1.84165	46.2742
													LOC100167666	NC_042496.1;33397417;+	growth arrest-specific protein 2-like	-1.97732	-33
													LOC100168603	NC_042496.1;41149796;+	RNA-binding protein cabeza	-2.12011	-28.3582

## Sheet: Seq DE & DM isoforms
	2nd vs. 1st						3rd vs. 2nd						4th vs. 3rd						YA vs. 4th								Summary
	LOC #	Genomic Location	Gene Name	Diff. Exp. (log2FoldChange)	Diff. Meth. (% diff. meth.)		LOC #	Genomic Location	Gene Name	Diff. Exp. (log2FoldChange)	Diff. Meth. (% diff. meth.)		LOC #	Genomic Location	Gene Name	Diff. Exp. (log2FoldChange)	Diff. Meth. (% diff. meth.)		LOC #	Genomic Location	Gene Name	Diff. Exp. (log2FoldChange)	Diff. Meth. (% diff. meth.)
	LOC100160159	NC_042494.1;90488014;-	protein polybromo-1-like	-19.716	48.6395		LOC100167675	NC_042493.1;69142832;-	piwi-like protein 1-like	19.2329	-31.8182		LOC100164947	NC_042493.1;42402881;-	LOC100164947	-19.6237	39.7959		LOC100164619	NC_042493.1;46524985;-	uncharacterized LOC100164619	20.4714	40.8696				1v2	2v3	3v4	4vY
	LOC100163062	NC_042496.1;23906607;+	hrp65 protein-like	-15.4115	44.835		LOC100167255	NC_042494.1;66981441;+	fatty acid synthase-like	-19.6425	41.3984		LOC100164619	NC_042493.1;46524985;-	uncharacterized LOC100164619	-20.5956	-38.8357		LOC100159030	NC_042493.1;56121326;+	CCR4-NOT transcription complex subunit 1-like	16.9049	-43.4812				1v2	2v3	3v4	4vY	Sum	%
							LOC100168279	NC_042494.1;107450505;+	hypoxia up-regulated protein 1-like	-9.25982	34.3583		LOC100159030	NC_042493.1;56119297;-	CCR4-NOT transcription complex subunit 1-like	-18.2087	31.9444		LOC100160500	NC_042494.1;110051749;+	transcription initiation factor TFIID subunit 1-like	20.1133	30.2942			red	2	5	11	1	19	54.2857
							LOC100160500	NC_042494.1;110044030;-	transcription initiation factor TFIID subunit 1-like	16.9477	46.558		LOC100168619	NC_042493.1;56242854;+	NFX1-type zinc finger-containing protein 1-like	16.6673	-43.7761		LOC100166428	NC_042495.1;65493470;+	endoribonuclease dcr-1-like	-16.5492	33.8261			blue	0	7	5	4	16	45.7143
							LOC100167998	NC_042494.1;113463097;+	ring canal kelch homolog	-14.4558	43.8378		LOC100166663	NC_042493.1;122219940;-	probable protein phosphatase CG10417-like	-12.6466	43.9619		LOC100163695	NC_042495.1;103437121;-	uncharacterized LOC100163695	17.7377	48.3051			orange	0	1	7	1	9	25.7143
		Key					LOC100168736	NC_042495.1;34512734;+	sestrin-3-like	-13.9549	41.526		LOC100167519	NC_042494.1;68655170;-	uncharacterized protein CG42248-like	-19.5487	28									green	2	11	9	4	26	74.2857
		downregulated					LOC100162402	NC_042495.1;51696932;+	rap guanine nucleotide exchange factor 2	7.44715	30.1061		LOC100164643	NC_042494.1;108693187;-	NFX1-type zinc finger-containing protein 1-like	15.0902	-34.2979									Red & Orange	0	0	4	0	4	11.4286
		up-regualted					LOC100166628	NC_042495.1;56017454;+	WD repeat-containing protein 59-like	17.3205	46.0407		LOC100167998	NC_042494.1;113458668;-	ring canal kelch homolog	14.3701	38.5343									Blue & Orange	0	1	3	1	5	14.2857
		hypomethylated					LOC100168393	NC_042495.1;77950077;+	cohesin subunit SA-1-like	16.5662	45.6829		LOC100169254	NC_042494.1;157954013;-	CCR4-NOT transcription complex subunit 1-like	-19.6273	39.6226									Red & Green	2	5	7	1	15	42.8571
		hypermethyalted					LOC100163695	NC_042495.1;103436913;-	uncharacterized LOC100163695	19.7409	34.6154		LOC100168156	NC_042495.1;639280;+	uncharacterized LOC100168156	10.1353	-41.381									Blue and Green	0	6	2	3	11	31.4286
							LOC100158837	NC_042495.1;109266624;+	zinc finger protein 845-like	-17.6911	30.4348		LOC100161761	NC_042495.1;47661408;-	uncharacterized LOC100161761	-17.6048	-25.4545
							LOC100164664	NC_042496.1;33986400;+	uncharacterized LOC100164664	16.5106	44.1901		LOC100165888	NC_042495.1;49398959;-	uncharacterized LOC100165888	-3.95735	-41.8478
													LOC100160617	NC_042495.1;94335418;+	guanylate cyclase 32E-like	-16.0901	-37.6653
													LOC100168636	NC_042495.1;97443560;+	basement membrane-specific heparan sulfate proteoglycan core protein-like	-20.1028	40.3333
													LOC100163623	NC_042495.1;103855719;+	protein scribble homolog	-17.854	28.1818
													LOC100572704	NC_042495.1;108199888;+	gamma-tubulin complex component 6-like	15.7205	31.25

## Sheet: LSS DE and DM genes
	1vREST										2vREST		3vREST		4vREST					YAvREST
	LOC #	Gene Name	Diff. Exp. (log2FoldChange)	Diff. Meth. (% diff. meth.)							LOC #		LOC #		LOC #	Gene Name	Diff. Exp. (log2FoldChange)	Diff. Meth. (% diff. meth.)		LOC #
	LOC100162936	laminin subunit alpha-1-like	2.59552	29.6503	32.6546	32.7744	34.5385	42.6656	45.3119		"-none-"		"-none-"		LOC100164103	microtubule-actin cross-linking factor 1, isoforms 1/2/3/5-like	1.94689	-26.4124		"-none-"
	LOC100163644	uncharacterized WD repeat-containing protein alr3466-like	-5.04101	31.5625	46.3656										LOC100168855	low-density lipoprotein receptor-related protein 2-like	1.87582	-26.2309
	LOC100166959	3-oxoacyl-[acyl-carrier-protein] reductase-like	-2.62371	28.5854
	LOC100572661	-	3.20168	31.2485	47.5814
	LOC100573180	-	1.84663	25.2477
	Key
	downregulated
	up-regualted
	hypomethylated
	hypermethyalted

## Sheet: LSS DE and DM isofroms
	1vREST	2vREST	3vREST	4vREST	YAvREST
	LOC #	LOC #	LOC #	LOC #	LOC #
	"-none-"	"-none-"	"-none-"	"-none-"	"-none-"
	Key
	downregulated
	up-regualted
	hypomethylated
	hypermethyalted
